# Supplementary material for: Delineating the Switch between Senescence and Apoptosis in Cervical Cancer Cells under Ciclopirox Treatment
Source: MDPI journal article supplement (doi:10.3390/cancers13194995), 2021-10-05
Supplement: s1 [file s1]

Supplementary Material

## **Delineating the Switch Between Senescence and Apoptosis in Cervical Cancer Cells Under Ciclopirox Treatment**

**Anja L. Herrmann, Bianca J. Kuhn, Angela Holzer, Jeroen Krijgsveld, Karin Hoppe-Seyler and Felix Hoppe-Seyler**

Supplementary Figures S1-S6

Related to Figure 1B:

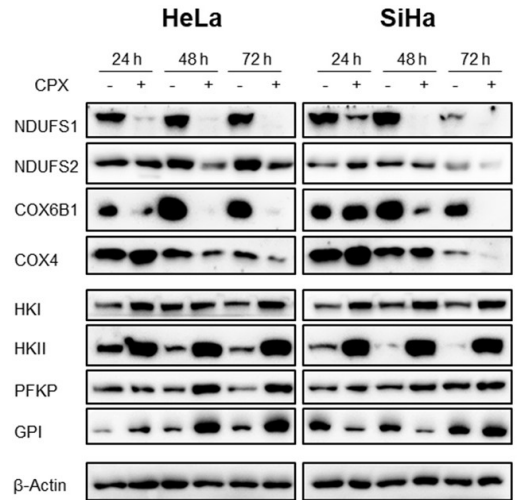

Uncropped original blots corresponding to Figure 1B:

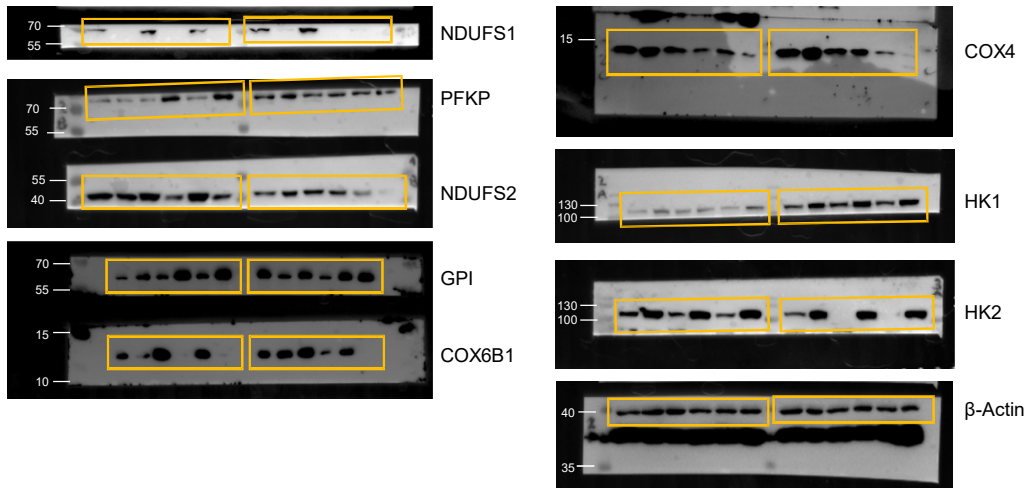

Densitometric analyses of blots in Figure 1B, upper values show raw densitometric readings, lower values are normalized to the sample written in **blue** (if possible the first lane):

|        | HeLa            |          |          |          |          |          | SiHa            |          |          |          |          |          |                 |
|--------|-----------------|----------|----------|----------|----------|----------|-----------------|----------|----------|----------|----------|----------|-----------------|
| Lane   | 1               | 2        | 3        | 4        | 5        | 6        | 1               | 2        | 3        | 4        | 5        | 6        |                 |
| NDUFS1 | <b>22548179</b> | 1759790  | 24015108 | 751335   | 23104815 | 0        | <b>26719300</b> | 9697016  | 28769229 | 369607   | 7200752  | 0        | raw values      |
|        | <b>1.00</b>     | 0.08     | 1.07     | 0.03     | 1.02     | 0.00     | <b>1.00</b>     | 0.36     | 1.08     | 0.01     | 0.27     | 0.00     | relative values |
| NDUFS2 | <b>19742522</b> | 19368765 | 24028421 | 12337744 | 27291714 | 15449572 | <b>11103309</b> | 13804915 | 13613380 | 10988894 | 7179338  | 2118891  | raw values      |
|        | <b>1.00</b>     | 0.98     | 1.22     | 0.62     | 1.38     | 0.78     | <b>1.00</b>     | 1.24     | 1.23     | 0.99     | 0.65     | 0.19     | relative values |
| COX6B1 | <b>17111158</b> | 9216187  | 45951191 | 2325577  | 31258735 | 1238163  | <b>21766643</b> | 28888128 | 38009170 | 9262187  | 23102350 | 0        | raw values      |
|        | <b>1.00</b>     | 0.54     | 2.69     | 0.14     | 1.83     | 0.07     | <b>1.00</b>     | 1.33     | 1.75     | 0.43     | 1.06     | 0.00     | relative values |
| COX4   | <b>26460472</b> | 29208563 | 19064915 | 8458631  | 11738066 | 4111246  | <b>28587078</b> | 35688706 | 21984693 | 17551208 | 5797196  | 564263   | raw values      |
|        | <b>1.00</b>     | 1.10     | 0.72     | 0.32     | 0.44     | 0.16     | <b>1.00</b>     | 1.25     | 0.77     | 0.61     | 0.20     | 0.02     | relative values |
| HKI    | <b>13061966</b> | 23201815 | 19041501 | 19595522 | 14277158 | 24449250 | <b>11514844</b> | 19680522 | 15335865 | 22753572 | 12994258 | 21689622 | raw values      |
|        | <b>1.00</b>     | 1.78     | 1.46     | 1.50     | 1.09     | 1.87     | <b>1.00</b>     | 1.71     | 1.33     | 1.98     | 1.13     | 1.88     | relative values |
| HKII   | <b>17498137</b> | 34498128 | 10505480 | 32163401 | 9603581  | 35677007 | <b>9785874</b>  | 33774300 | 3169175  | 35092401 | 2301134  | 32948158 | raw values      |
|        | <b>1.00</b>     | 1.97     | 0.60     | 1.84     | 0.55     | 2.04     | <b>1.00</b>     | 3.45     | 0.32     | 3.59     | 0.24     | 3.37     | relative values |
| PFKP   | <b>14504258</b> | 12464602 | 11114480 | 23950744 | 9102702  | 21949208 | <b>12583723</b> | 13284258 | 13395844 | 18204622 | 17520966 | 20141622 | raw values      |
|        | <b>1.00</b>     | 0.86     | 0.77     | 1.65     | 0.63     | 1.51     | <b>1.00</b>     | 1.06     | 1.06     | 1.45     | 1.39     | 1.60     | relative values |
| GPI    | <b>3345347</b>  | 11872602 | 8001752  | 28221078 | 10872480 | 29570836 | <b>19226572</b> | 8436752  | 16207744 | 5825903  | 18783057 | 24294957 | raw values      |
|        | <b>1.00</b>     | 3.55     | 2.39     | 8.44     | 3.25     | 8.84     | <b>1.00</b>     | 0.44     | 0.84     | 0.30     | 0.98     | 1.26     | relative values |
| Actin  | <b>15686744</b> | 20234593 | 20413371 | 16619643 | 17592007 | 17713007 | <b>19541522</b> | 17069229 | 16622744 | 17329208 | 15877622 | 15651794 | raw values      |
|        | <b>1.00</b>     | 1.29     | 1.30     | 1.06     | 1.12     | 1.13     | <b>1.00</b>     | 0.87     | 0.85     | 0.89     | 0.81     | 0.80     | relative values |

**Figure S1.** Uncropped blots and quantification of immunoblots. Uncropped original immunoblots including molecular weight markers are depicted. Immunoblots were quantified densitometrically (raw values) and were normalized to the sample written in blue (relative values). Continued on next pages.

Related to Figure 2B:

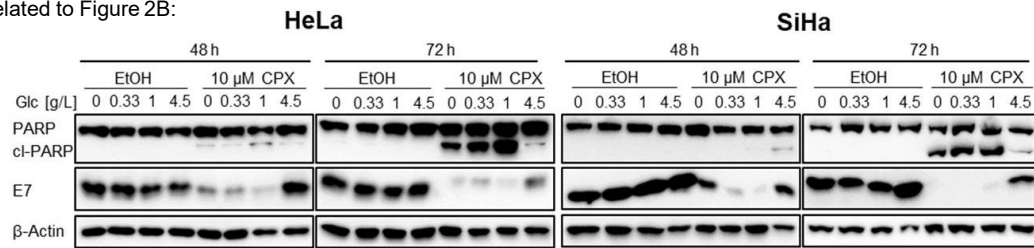

Uncropped original blots corresponding to Figure 2B:

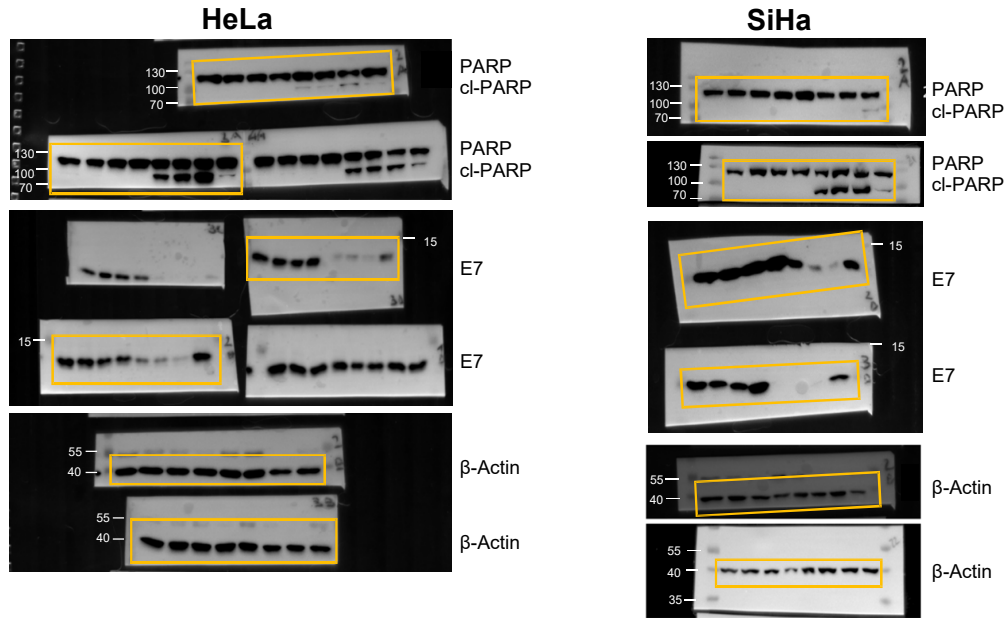

Densitometric analyses of blots in Figure 2B, upper values show raw densitometric readings, lower values are normalized to the sample written in **blue** (if possible the first lane):

| HeLa (48 h)  |                 |          |          |          |                |          |          |          |                 |
|--------------|-----------------|----------|----------|----------|----------------|----------|----------|----------|-----------------|
| Lane         | 1               | 2        | 3        | 4        | 5              | 6        | 7        | 8        |                 |
| cleaved PARP | 0               | 0        | 0        | 0        | <b>3009690</b> | 1770205  | 10361510 | 1565426  | raw values      |
|              | 0.00            | 0.00     | 0.00     | 0.00     | <b>1.00</b>    | 0.59     | 3.44     | 0.52     | relative values |
| E7           | <b>33649848</b> | 32915969 | 25328484 | 23331362 | 11122279       | 8336773  | 6515175  | 33672484 | raw values      |
|              | <b>1.00</b>     | 0.98     | 0.75     | 0.69     | 0.33           | 0.25     | 0.19     | 1.00     | relative values |
| Actin        | <b>20745380</b> | 22613087 | 21758622 | 22423208 | 23291915       | 24183401 | 16113723 | 19080673 | raw values      |
|              | <b>1.00</b>     | 1.09     | 1.05     | 1.08     | 1.12           | 1.17     | 0.78     | 0.92     | relative values |

| HeLa (72 h)  |                 |          |          |          |                 |          |          |          |                 |
|--------------|-----------------|----------|----------|----------|-----------------|----------|----------|----------|-----------------|
| Lane         | 1               | 2        | 3        | 4        | 5               | 6        | 7        | 8        |                 |
| cleaved PARP | 0               | 0        | 0        | 0        | <b>17712451</b> | 27823128 | 37788350 | 1853669  | raw values      |
|              | 0.00            | 0.00     | 0.00     | 0.00     | <b>1.00</b>     | 1.57     | 2.13     | 0.10     | relative values |
| E7           | <b>33001990</b> | 31867605 | 29028291 | 31010413 | 2117820         | 4546246  | 3019719  | 13866300 | raw values      |
|              | <b>1.00</b>     | 0.97     | 0.88     | 0.94     | 0.06            | 0.14     | 0.09     | 0.42     | relative values |
| Actin        | <b>27834271</b> | 28000128 | 26720300 | 28391664 | 25737421        | 19916815 | 21044765 | 23113492 | raw values      |
|              | <b>1.00</b>     | 1.01     | 0.96     | 1.02     | 0.92            | 0.72     | 0.76     | 0.83     | relative values |

| SiHa (48 h)  |                 |          |          |          |          |          |          |                |                 |
|--------------|-----------------|----------|----------|----------|----------|----------|----------|----------------|-----------------|
| Lane         | 1               | 2        | 3        | 4        | 5        | 6        | 7        | 8              |                 |
| cleaved PARP | 0               | 0        | 0        | 0        | 0        | 0        | 0        | <b>9731187</b> | raw values      |
|              | 0               | 0        | 0        | 0        | 0        | 0        | 0        | <b>1</b>       | relative values |
| E7           | <b>34659371</b> | 39140271 | 44445534 | 47378040 | 17434664 | 2639719  | 1612749  | 17325179       | raw values      |
|              | <b>1.00</b>     | 1.13     | 1.28     | 1.37     | 0.50     | 0.08     | 0.05     | 0.50           | relative values |
| Actin        | <b>23090401</b> | 22743836 | 19428714 | 15661815 | 18324229 | 18913350 | 21584421 | 13690208       | raw values      |
|              | <b>1.00</b>     | 0.98     | 0.84     | 0.68     | 0.79     | 0.82     | 0.93     | 0.59           | relative values |

| SiHa (72 h)  |                 |          |          |          |                 |          |          |          |                 |
|--------------|-----------------|----------|----------|----------|-----------------|----------|----------|----------|-----------------|
| Lane         | 1               | 2        | 3        | 4        | 5               | 6        | 7        | 8        |                 |
| cleaved PARP | 0               | 0        | 0        | 0        | <b>16303986</b> | 27134472 | 26534957 | 4054125  | raw values      |
|              | 0.00            | 0.00     | 0.00     | 0.00     | <b>1.00</b>     | 1.66     | 1.63     | 0.25     | relative values |
| E7           | <b>32582149</b> | 26220492 | 26926200 | 39257120 | 0               | 0        | 681021   | 17310693 | raw values      |
|              | <b>1.00</b>     | 0.80     | 0.83     | 1.20     | 0.00            | 0.00     | 0.02     | 0.53     | relative values |
| Actin        | <b>17613794</b> | 19535087 | 16659844 | 10572480 | 19972622        | 24443744 | 21700501 | 20419572 | raw values      |
|              | <b>1.00</b>     | 1.11     | 0.95     | 0.60     | 1.13            | 1.39     | 1.23     | 1.16     | relative values |

Figure S1 continued.

Related to Figure 3C:

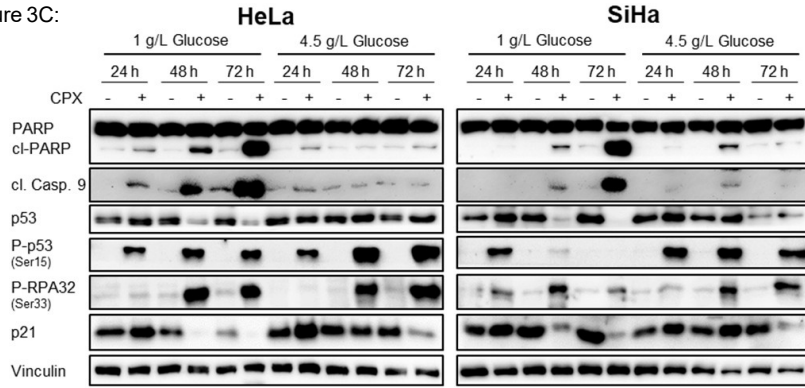

Uncropped original blots corresponding to Figure 3C:

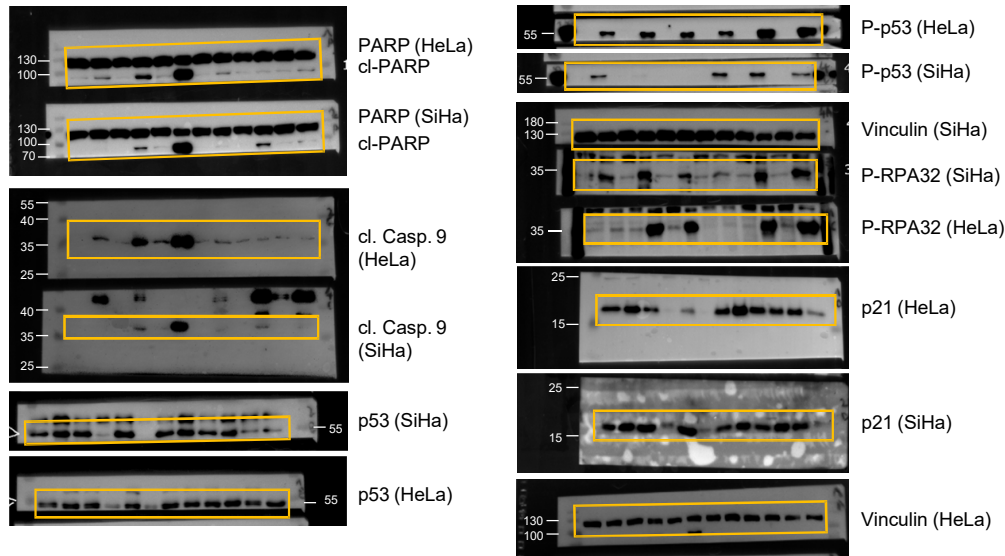

Densitometric analyses of blots in Figure 3C, upper values show raw densitometric readings, lower values are normalized to the sample written in **blue** (if possible the first lane):

| HeLa              |                 |                 |          |          |          |          |          |          |          |          |          |          |
|-------------------|-----------------|-----------------|----------|----------|----------|----------|----------|----------|----------|----------|----------|----------|
| Lane              | 1               | 2               | 3        | 4        | 5        | 6        | 7        | 8        | 9        | 10       | 11       | 12       |
| cleaved PARP      | 1971134         | <b>7107581</b>  | 1822062  | 17755815 | 7636874  | 43241057 | 4556104  | 5074731  | 1298062  | 1690548  | 1569548  | 3715832  |
|                   | 0.28            | <b>1.00</b>     | 0.26     | 2.50     | 1.07     | 6.08     | 0.64     | 0.71     | 0.18     | 0.24     | 0.22     | 0.52     |
| cleaved Caspase 9 | 0               | <b>7624874</b>  | 3668640  | 23902563 | 12342037 | 45790877 | 5956974  | 5238731  | 2956619  | 2998740  | 2140497  | 1959548  |
|                   | 0.00            | <b>1.00</b>     | 0.48     | 3.13     | 1.62     | 6.01     | 0.78     | 0.69     | 0.39     | 0.39     | 0.28     | 0.26     |
| p53               | <b>17993350</b> | 22455765        | 20504472 | 6995267  | 19034693 | 7980731  | 22918401 | 21034643 | 22523472 | 25339421 | 17711643 | 22345815 |
|                   | <b>1.00</b>     | 1.25            | 1.14     | 0.39     | 1.06     | 0.44     | 1.27     | 1.17     | 1.25     | 1.41     | 0.98     | 1.24     |
| P-p53             | 0               | <b>16344430</b> | 0        | 22909229 | 0        | 21274037 | 0        | 18661279 | 0        | 39537936 | 0        | 41514563 |
|                   | 0.00            | <b>1.00</b>     | 0.00     | 1.40     | 0.00     | 1.30     | 0.00     | 1.14     | 0.00     | 2.42     | 0.00     | 2.54     |
| P-RPA32           | <b>1621062</b>  | 2103548         | 1957305  | 33931635 | 3531690  | 24540543 |          | 491607   | 424021   | 29116806 | 4105347  | 39468706 |
|                   | <b>1.00</b>     | 1.30            | 1.21     | 20.93    | 2.18     | 15.14    | 0.00     | 0.30     | 0.26     | 17.96    | 2.53     | 24.35    |
| p21               | <b>25780513</b> | 33933676        | 19784392 | 1930991  | 8559723  | 2149719  | 26589342 | 44979697 | 34185413 | 25959220 | 26217685 | 9781966  |
|                   | <b>1.00</b>     | 1.32            | 0.77     | 0.07     | 0.33     | 0.08     | 1.03     | 1.74     | 1.33     | 1.01     | 1.02     | 0.38     |
| Vinculin          | <b>24040087</b> | 20055673        | 22129794 | 17124016 | 16854208 | 19148208 | 20521501 | 24382329 | 22174380 | 20166894 | 13719773 | 15886430 |
|                   | <b>1.00</b>     | 0.83            | 0.92     | 0.71     | 0.70     | 0.80     | 0.85     | 1.01     | 0.92     | 0.84     | 0.57     | 0.66     |

  

| SiHa              |                 |                 |          |                |          |          |          |          |          |          |          |          |
|-------------------|-----------------|-----------------|----------|----------------|----------|----------|----------|----------|----------|----------|----------|----------|
| Lane              | 1               | 2               | 3        | 4              | 5        | 6        | 7        | 8        | 9        | 10       | 11       | 12       |
| cleaved PARP      | 0               | 0               | 0        | <b>8574359</b> | 1011062  | 43397735 | 0        | 214849   | 0        | 10535844 | 327678   | 771527   |
|                   | 0.00            | 0.00            | 0.00     | <b>1.00</b>    | 0.12     | 5.06     | 0.00     | 0.03     | 0.00     | 1.23     | 0.04     | 0.09     |
| cleaved Caspase 9 | 0               | 0               | 0        | <b>5325731</b> | 0        | 30406886 | 0        | 1040920  | 0        | 2756054  | 0        | 86607    |
|                   | 0.00            | 0.00            | 0.00     | <b>1.00</b>    | 0.00     | 5.71     | 0.00     | 0.20     | 0.00     | 0.52     | 0.00     | 0.02     |
| p53               | <b>11883551</b> | 24070300        | 22106765 | 1913104        | 25740451 | 2141719  | 20099229 | 23775158 | 17515279 | 20327451 | 6475702  | 6295338  |
|                   | <b>1.00</b>     | 2.03            | 1.86     | 0.16           | 2.17     | 0.18     | 1.69     | 2.00     | 1.47     | 1.71     | 0.54     | 0.53     |
| P-p53             | 0               | <b>21357765</b> | 0        | 2644790        | 0        | 0        | 0        | 28104078 | 0        | 29542593 | 0        | 26279714 |
|                   | 0.00            | <b>1.00</b>     | 0.00     | 0.12           | 0.00     | 0.00     | 0.00     | 1.32     | 0.00     | 1.38     | 0.00     | 1.23     |
| P-RPA32           | 3003619         | <b>11127380</b> | 1095234  | 19670886       | 1927134  | 7733652  | 1361891  | 4059539  | 1310891  | 18816007 | 1065991  | 22360999 |
|                   | 0.27            | <b>1.00</b>     | 0.10     | 1.77           | 0.17     | 0.70     | 0.12     | 0.36     | 0.12     | 1.69     | 0.10     | 2.01     |
| p21               | <b>19420815</b> | 28877907        | 31037978 | 9528037        | 29607877 | 6249116  | 16912836 | 25429492 | 18889078 | 26037200 | 22335442 | 7893288  |
|                   | <b>1.00</b>     | 1.49            | 1.60     | 0.49           | 1.52     | 0.32     | 0.87     | 1.31     | 0.97     | 1.34     | 1.15     | 0.41     |
| Vinculin          | <b>28483250</b> | 22097057        | 25511300 | 24269593       | 27161421 | 26555714 | 25794179 | 21588936 | 18845815 | 12184087 | 17353329 | 12830137 |
|                   | <b>1.00</b>     | 0.78            | 0.90     | 0.85           | 0.95     | 0.93     | 0.91     | 0.76     | 0.66     | 0.43     | 0.61     | 0.45     |

Figure S1 continued.

Related to Figure 4A:

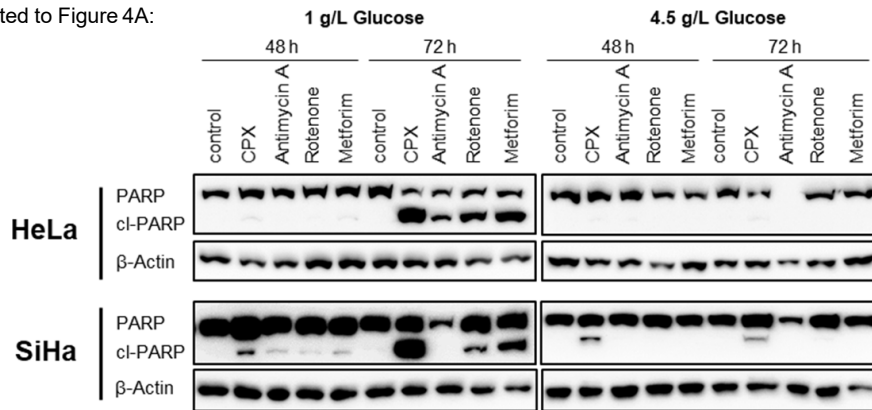

Uncropped original blots corresponding to Figure 4A:

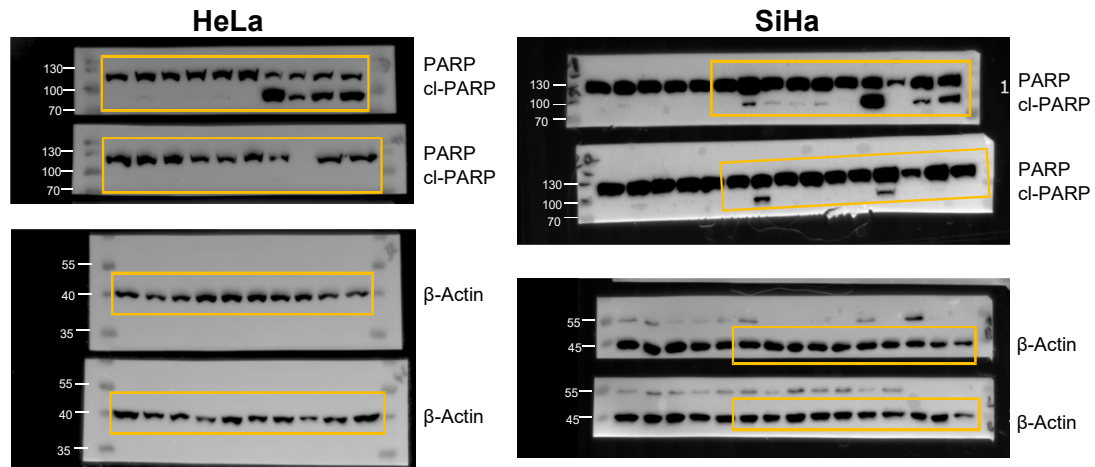

Densitometric analyses of blots in Figure 4A, upper values show raw densitometric readings, lower values are normalized to the sample written in **blue** (if possible the first lane):

| HeLa, 1 g/L Glucose |                 |          |          |          |          |          |                 |          |          |          |                 |
|---------------------|-----------------|----------|----------|----------|----------|----------|-----------------|----------|----------|----------|-----------------|
| Lane                | 1               | 2        | 3        | 4        | 5        | 6        | 7               | 8        | 9        | 10       |                 |
| cleaved PARP        | 0               | 429435   | 0        | 0        | 386607   | 0        | <b>35486229</b> | 13169915 | 21073037 | 27033350 | raw values      |
|                     | 0.00            | 0.01     | 0.00     | 0.00     | 0.01     | 0.00     | <b>1.00</b>     | 0.37     | 0.59     | 0.76     | relative values |
| Actin               | <b>19348522</b> | 13645915 | 15949865 | 23794836 | 24373664 | 22803250 | 20111886        | 17926936 | 13817208 | 13595794 | raw values      |
|                     | <b>1.00</b>     | 0.71     | 0.82     | 1.23     | 1.26     | 1.18     | 1.04            | 0.93     | 0.71     | 0.70     | relative values |

  

| HeLa, 4.5 g/L Glucose |                 |          |          |         |          |          |          |         |          |          |                 |
|-----------------------|-----------------|----------|----------|---------|----------|----------|----------|---------|----------|----------|-----------------|
| Lane                  | 1               | 2        | 3        | 4       | 5        | 6        | 7        | 8       | 9        | 10       |                 |
| cleaved PARP          | 0               | 0        | 0        | 0       | 0        | 0        | 0        | 0       | 0        | 0        | raw values      |
|                       | 0.00            | 0.00     | 0.00     | 0.00    | 0.00     | 0.00     | 0.00     | 0.00    | 0.00     | 0.00     | relative values |
| Actin                 | <b>23260693</b> | 14342844 | 13728087 | 9601945 | 17967551 | 13880016 | 15566016 | 8268874 | 15808501 | 22409350 | raw values      |
|                       | <b>1.00</b>     | 0.62     | 0.59     | 0.41    | 0.77     | 0.60     | 0.67     | 0.36    | 0.68     | 0.96     | relative values |

  

| SiHa, 1 g/L Glucose |                 |          |          |          |          |          |                 |          |          |          |                 |
|---------------------|-----------------|----------|----------|----------|----------|----------|-----------------|----------|----------|----------|-----------------|
| Lane                | 1               | 2        | 3        | 4        | 5        | 6        | 7               | 8        | 9        | 10       |                 |
| cleaved PARP        | 0               | 6695338  | 1502548  | 740577   | 1292962  | 0        | <b>43241836</b> | 0        | 10492551 | 22191451 | raw values      |
|                     | 0.00            | 0.15     | 0.03     | 0.02     | 0.03     | 0.00     | <b>1.00</b>     | 0.00     | 0.24     | 0.51     | relative values |
| Actin               | <b>23452522</b> | 25144179 | 20887522 | 21768865 | 20588572 | 21733986 | 18969279        | 18515158 | 14337087 | 13259087 | raw values      |
|                     | <b>1.00</b>     | 1.07     | 0.89     | 0.93     | 0.88     | 0.93     | 0.81            | 0.79     | 0.61     | 0.57     | relative values |

  

| SiHa, 4.5 g/L Glucose |                 |          |          |          |          |          |                |          |          |          |                 |
|-----------------------|-----------------|----------|----------|----------|----------|----------|----------------|----------|----------|----------|-----------------|
| Lane                  | 1               | 2        | 3        | 4        | 5        | 6        | 7              | 8        | 9        | 10       |                 |
| cleaved PARP          | 0               | 14097158 | 0        | 0        | 0        | 0        | <b>9911673</b> | 0        | 564092   | 0        | raw values      |
|                       | 0.00            | 1.42     | 0.00     | 0.00     | 0.00     | 0.00     | <b>1.00</b>    | 0.00     | 0.06     | 0.00     | relative values |
| Actin                 | <b>20255087</b> | 17816258 | 23556208 | 21391966 | 19896794 | 17116309 | 17501744       | 18125815 | 20726522 | 10411480 | raw values      |
|                       | <b>1.00</b>     | 0.88     | 1.16     | 1.06     | 0.98     | 0.85     | 0.86           | 0.89     | 1.02     | 0.51     | relative values |

Figure S1 continued.

Related to Figure 6A:

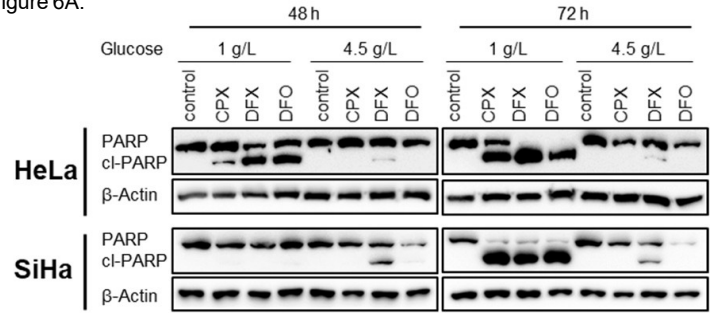

Uncropped original blots corresponding to Figure 6A:

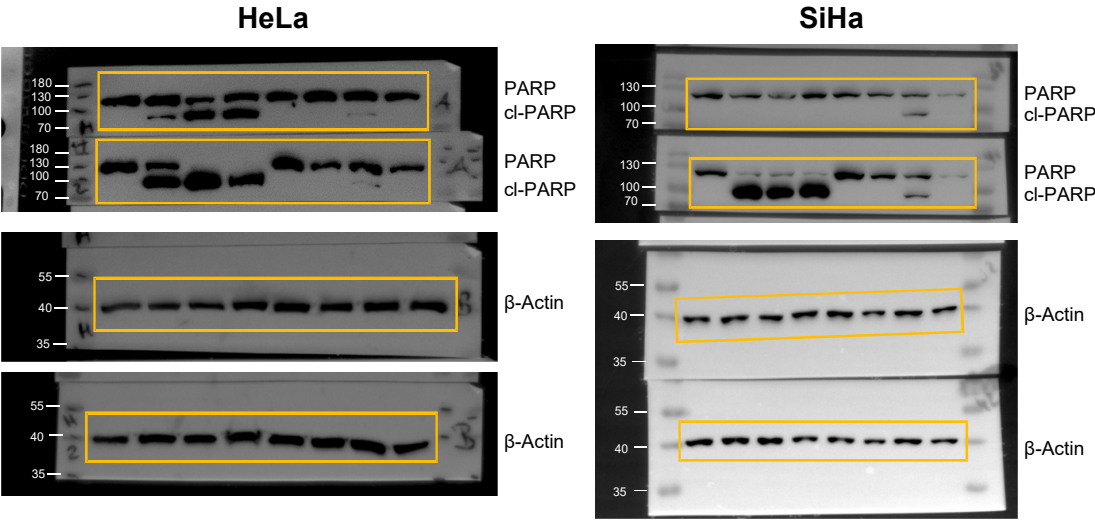

Densitometric analyses of blots in Figure 6A, upper values show raw densitometric readings, lower values are normalized to the sample written in blue (if possible the first lane):

| HeLa (48 h)  |          |          |          |          |          |          |          |          |                 |
|--------------|----------|----------|----------|----------|----------|----------|----------|----------|-----------------|
| Lane         | 1        | 2        | 3        | 4        | 5        | 6        | 7        | 8        |                 |
| cleaved PARP | 0        | 5642731  | 19181572 | 23985329 | 0        | 0        | 988598   | 0        | raw values      |
|              | 0.00     | 1.00     | 3.40     | 4.25     | 0.00     | 0.00     | 0.18     | 0.00     | relative values |
| Actin        | 17567179 | 16956936 | 19755836 | 25217250 | 28011785 | 22854714 | 27773200 | 27218321 | raw values      |
|              | 1.00     | 0.97     | 1.12     | 1.44     | 1.59     | 1.30     | 1.58     | 1.55     | relative values |

| HeLa (72 h)  |          |          |          |          |          |          |          |          |                 |
|--------------|----------|----------|----------|----------|----------|----------|----------|----------|-----------------|
| Lane         | 1        | 2        | 3        | 4        | 5        | 6        | 7        | 8        |                 |
| cleaved PARP | 0        | 35323229 | 47883614 | 30030593 | 0        | 0        | 1754477  | 0        | raw values      |
|              | 0.00     | 1.00     | 1.36     | 0.85     | 0.00     | 0.00     | 0.05     | 0.00     | relative values |
| Actin        | 17485865 | 24709279 | 20943329 | 26828421 | 26312643 | 27985472 | 30211028 | 22624028 | raw values      |
|              | 1.00     | 1.41     | 1.20     | 1.53     | 1.50     | 1.60     | 1.73     | 1.29     | relative values |

| SiHa (48 h)  |          |          |          |          |          |          |          |          |                 |
|--------------|----------|----------|----------|----------|----------|----------|----------|----------|-----------------|
| Lane         | 1        | 2        | 3        | 4        | 5        | 6        | 7        | 8        |                 |
| cleaved PARP | 0        | 0        | 0        | 0        | 0        | 0        | 13124652 | 166849   | raw values      |
|              | 0.00     | 0.00     | 0.00     | 0.00     | 0.00     | 0.00     | 1.00     | 0.01     | relative values |
| Actin        | 20744158 | 22011522 | 18887572 | 21872522 | 23021643 | 15652208 | 21528865 | 16795744 | raw values      |
|              | 1.00     | 1.06     | 0.91     | 1.05     | 1.11     | 0.75     | 1.04     | 0.81     | relative values |

| SiHa (72 h)  |          |          |          |          |          |          |          |          |                 |
|--------------|----------|----------|----------|----------|----------|----------|----------|----------|-----------------|
| Lane         | 1        | 2        | 3        | 4        | 5        | 6        | 7        | 8        |                 |
| cleaved PARP | 0        | 36810321 | 30545907 | 35981886 | 0        | 0        | 4832246  | 0        | raw values      |
|              | 0.00     | 1.00     | 0.83     | 0.98     | 0.00     | 0.00     | 0.13     | 0.00     | relative values |
| Actin        | 19370894 | 20878187 | 19990480 | 15132652 | 16388602 | 12021338 | 17644359 | 14072581 | raw values      |
|              | 1.00     | 1.08     | 1.03     | 0.78     | 0.85     | 0.62     | 0.91     | 0.73     | relative values |

Figure S1 continued.

Related to Figure 7A:

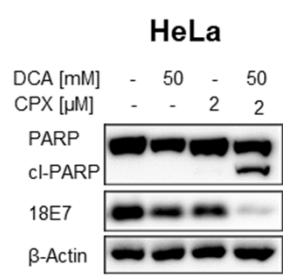

Uncropped original blots corresponding to Figure 7A:

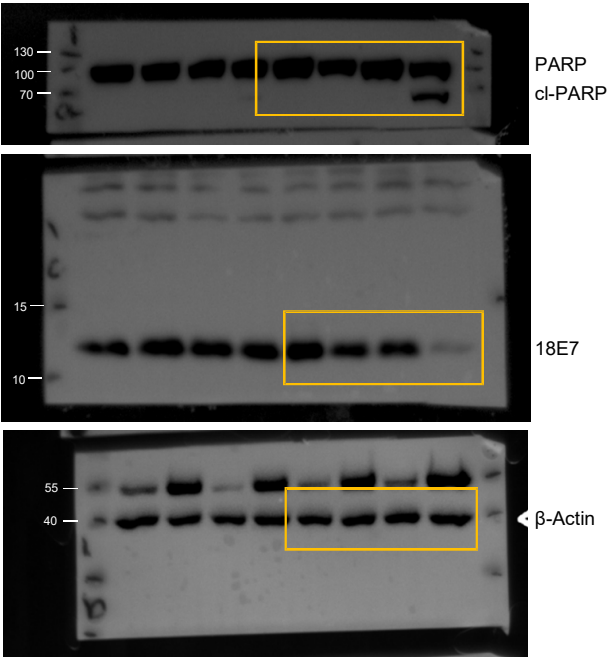

Densitometric analyses of blots in Figure 7A, upper values show raw densitometric readings, lower values are normalized to the sample written in blue (if possible the first lane):

| Lane         | 1        | 2        | 3        | 4        |                 |
|--------------|----------|----------|----------|----------|-----------------|
| cleaved PARP | 0        | 0        | 0        | 11962673 | raw values      |
|              | 0.00     | 0.00     | 0.00     | 1.00     | relative values |
| E7           | 28505543 | 20111765 | 21097886 | 3561004  | raw values      |
|              | 1.00     | 0.71     | 0.74     | 0.12     | relative values |
| Actin        | 20171179 | 20939421 | 21368714 | 23990543 | raw values      |
|              | 1.00     | 1.04     | 1.06     | 1.19     | relative values |

Figure S1 continued.



Related to Figure S5:

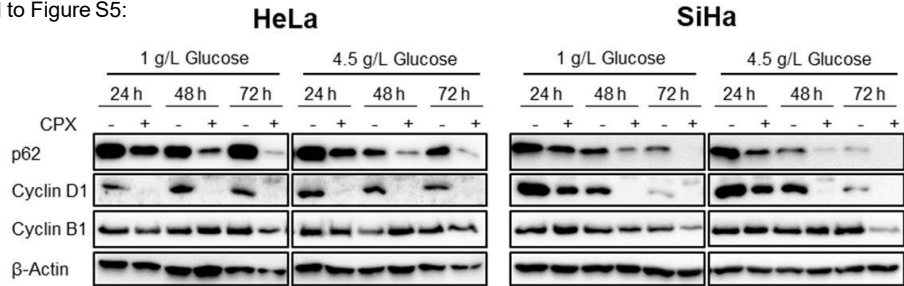

Uncropped original blots corresponding to Figure S5:

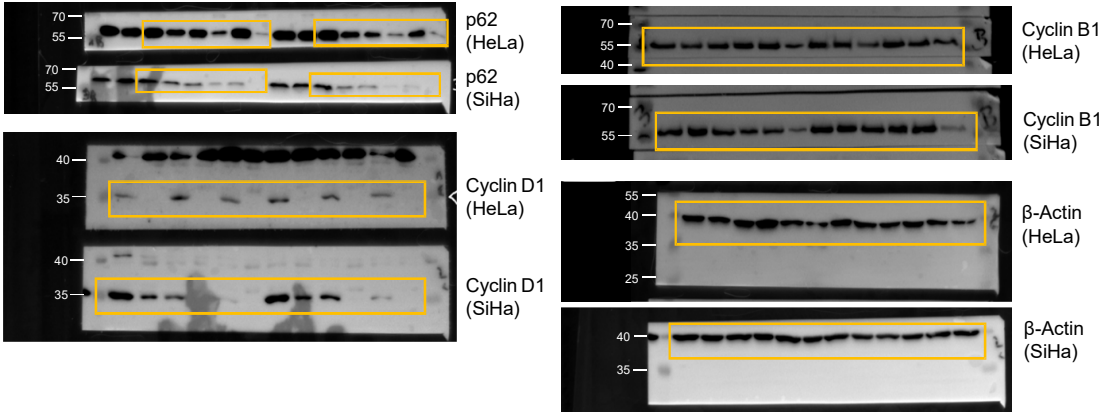

Densitometric analyses of blots in Figure S5, upper values show raw densitometric readings, lower values are normalized to the sample written in **blue** (if possible the first lane)

| Lane      | HeLa, 1 g/L Glucose |          |          |          |          |          | HeLa, 4.5 g/L Glucose |          |          |          |          |          |                 |
|-----------|---------------------|----------|----------|----------|----------|----------|-----------------------|----------|----------|----------|----------|----------|-----------------|
|           | 1                   | 2        | 3        | 4        | 5        | 6        | 7                     | 8        | 9        | 10       | 11       | 12       |                 |
| p62       | 31872250            | 21516279 | 24138986 | 11332309 | 31243593 | 4699974  | 34791250              | 21330936 | 14761794 | 5382681  | 18563350 | 2294790  | raw values      |
|           | 1.00                | 0.68     | 0.76     | 0.36     | 0.98     | 0.15     | 1.00                  | 0.61     | 0.42     | 0.15     | 0.53     | 0.07     | relative values |
| Cyclin D1 | 11907915            | 0        | 18566693 | 0        | 15405522 | 0        | 20953179              | 868920   | 15768037 | 0        | 12751309 | 0        | raw values      |
|           | 1.00                | 0.00     | 1.56     | 0.00     | 1.29     | 0.00     | 1.00                  | 0.04     | 0.75     | 0.00     | 0.61     | 0.00     | relative values |
| Cyclin B1 | 18088158            | 12861137 | 17031329 | 18942329 | 20323986 | 10771359 | 19641522              | 17020865 | 11336723 | 20431815 | 16728865 | 13487551 | raw values      |
|           | 1.00                | 0.71     | 0.94     | 1.05     | 1.12     | 0.60     | 1.00                  | 0.87     | 0.58     | 1.04     | 0.85     | 0.69     | relative values |
| Actin     | 22775057            | 20699643 | 24172543 | 30957907 | 20940179 | 14792037 | 24477836              | 21988765 | 18892815 | 21640108 | 17585744 | 12437137 | raw values      |
|           | 1.00                | 0.91     | 1.06     | 1.36     | 0.92     | 0.65     | 1.00                  | 0.90     | 0.77     | 0.88     | 0.72     | 0.51     | relative values |

| Lane      | SiHa, 1 g/L Glucose |          |          |          |          |          | SiHa, 4.5 g/L Glucose |          |          |          |          |          |                 |
|-----------|---------------------|----------|----------|----------|----------|----------|-----------------------|----------|----------|----------|----------|----------|-----------------|
|           | 1                   | 2        | 3        | 4        | 5        | 6        | 7                     | 8        | 9        | 10       | 11       | 12       |                 |
| p62       | 25680664            | 16802572 | 15461622 | 5073610  | 8480874  | 298192   | 25376321              | 12985087 | 9394773  | 1216062  | 2396569  | 0        | raw values      |
|           | 1.00                | 0.65     | 0.60     | 0.20     | 0.33     | 0.01     | 1.00                  | 0.51     | 0.37     | 0.05     | 0.09     | 0.00     | relative values |
| Cyclin D1 | 32480785            | 15690380 | 14479430 | 212364   | 2466205  | 0        | 30445128              | 16631673 | 18243087 | 878506   | 4884731  | 0        | raw values      |
|           | 1.00                | 0.48     | 0.45     | 0.01     | 0.08     | 0.00     | 1.00                  | 0.55     | 0.60     | 0.03     | 0.16     | 0.00     | relative values |
| Cyclin B1 | 15906258            | 17872622 | 14636258 | 11525309 | 11534187 | 6037146  | 19334572              | 18618279 | 17992158 | 18628572 | 21797936 | 5626024  | raw values      |
|           | 1.00                | 1.12     | 0.92     | 0.72     | 0.73     | 0.38     | 1.00                  | 0.96     | 0.93     | 0.96     | 1.13     | 0.29     | relative values |
| Actin     | 23812593            | 22731543 | 23151593 | 23242421 | 24538028 | 21050543 | 20715421              | 16818936 | 15873279 | 17762401 | 18735522 | 20037986 | raw values      |
|           | 1.00                | 0.95     | 0.97     | 0.98     | 1.03     | 0.88     | 1.00                  | 0.81     | 0.77     | 0.86     | 0.90     | 0.97     | relative values |

Figure S1 continued.



**Quantification of CFAs in Figure 3:**

| HeLa         | 72 h EtOH |          |       |         | 72 h CPX |          |       |         | 96 h EtOH |          |       |         | 96 h CPX |          |       |         |
|--------------|-----------|----------|-------|---------|----------|----------|-------|---------|-----------|----------|-------|---------|----------|----------|-------|---------|
|              | 0 g/L     | 0.33 g/L | 1 g/L | 4.5 g/L | 0 g/L    | 0.33 g/L | 1 g/L | 4.5 g/L | 0 g/L     | 0.33 g/L | 1 g/L | 4.5 g/L | 0 g/L    | 0.33 g/L | 1 g/L | 4.5 g/L |
| Glucose      | 80.00     | 85.07    | 86.16 | 88.00   | 32.42    | 18.98    | 14.19 | 24.85   | 84.51     | 89.18    | 90.13 | 88.48   | 4.79     | 2.25     | 0.41  | 8.69    |
| % area       | n.d.      | n.d.     | n.d.  | n.d.    | 726      | 417      | 323   | 547     | n.d.      | n.d.     | n.d.  | n.d.    | 159      | 97       | 23    | 293     |
| colony count |           |          |       |         |          |          |       |         |           |          |       |         |          |          |       |         |

| SiHa         | 72 h EtOH |          |       |         | 72 h CPX |          |       |         | 96 h EtOH |          |       |         | 96 h CPX |          |       |         |
|--------------|-----------|----------|-------|---------|----------|----------|-------|---------|-----------|----------|-------|---------|----------|----------|-------|---------|
|              | 0 g/L     | 0.33 g/L | 1 g/L | 4.5 g/L | 0 g/L    | 0.33 g/L | 1 g/L | 4.5 g/L | 0 g/L     | 0.33 g/L | 1 g/L | 4.5 g/L | 0 g/L    | 0.33 g/L | 1 g/L | 4.5 g/L |
| Glucose      | 85.23     | 96.00    | 99.19 | 99.96   | 25.20    | 21.30    | 1.46  | 0.46    | 84.25     | 93.13    | 99.13 | 99.37   | 0.55     | 0.02     | 0.00  | 0.03    |
| % area       | n.d.      | n.d.     | n.d.  | n.d.    | 518      | 485      | 32    | 15      | n.d.      | n.d.     | n.d.  | n.d.    | 32       | 1        | 0     | 1       |
| colony count |           |          |       |         |          |          |       |         |           |          |       |         |          |          |       |         |

**Quantification of CFAs in Figure 5:**

| HeLa         | 1 g/L Glucose |       |       |      |       | 4.5 g/L Glucose |       |       |       |       |
|--------------|---------------|-------|-------|------|-------|-----------------|-------|-------|-------|-------|
|              | control       | CPX   | AA    | Rot  | Met   | control         | CPX   | AA    | Rot   | Met   |
| % area       | 91.49         | 11.21 | 28.37 | 9.65 | 70.28 | 93.84           | 27.07 | 94.08 | 66.30 | 91.13 |
| colony count | n.d.          | 401   | 932   | 398  | n.d.  | n.d.            | 713   | n.d.  | n.d.  | n.d.  |

| SiHa         | 1 g/L Glucose |      |       |       |       | 4.5 g/L Glucose |      |       |       |       |
|--------------|---------------|------|-------|-------|-------|-----------------|------|-------|-------|-------|
|              | control       | CPX  | AA    | Rot   | Met   | control         | CPX  | AA    | Rot   | Met   |
| % area       | 86.97         | 0.68 | 35.34 | 47.82 | 46.38 | 90.21           | 0.76 | 96.96 | 87.72 | 93.47 |
| colony count | n.d.          | 53   | 995   | n.d.  | n.d.  | n.d.            | 30   | n.d.  | n.d.  | n.d.  |

**Quantification of CFAs in Figure 6:**

| HeLa         | 1 g/L Glucose |      |      |      | 4.5 g/L Glucose |      |       |      |
|--------------|---------------|------|------|------|-----------------|------|-------|------|
|              | control       | CPX  | DFX  | DFO  | control         | CPX  | DFX   | DFO  |
| % area       | 91.58         | 7.38 | 2.74 | 1.08 | 99.84           | 9.23 | 26.90 | 5.65 |
| colony count | n.d.          | 254  | 87   | 66   | n.d.            | 295  | 857   | 227  |

| SiHa         | 1 g/L Glucose |      |       |      | 4.5 g/L Glucose |      |      |      |
|--------------|---------------|------|-------|------|-----------------|------|------|------|
|              | control       | CPX  | DFX   | DFO  | control         | CPX  | DFX  | DFO  |
| % area       | 99.79         | 5.36 | 16.39 | 9.33 | 97.88           | 0.97 | 2.53 | 1.18 |
| colony count | n.d.          | 218  | 412   | 345  | n.d.            | 26   | 113  | 66   |

**Quantification of CFAs in Figure S4:**

| HeLa    | 24 h CPX |          |       |         | 48 h CPX |          |       |         | 72 h CPX |          |       |         | 96 h CPX |          |       |         |
|---------|----------|----------|-------|---------|----------|----------|-------|---------|----------|----------|-------|---------|----------|----------|-------|---------|
|         | 0 g/L    | 0.33 g/L | 1 g/L | 4.5 g/L | 0 g/L    | 0.33 g/L | 1 g/L | 4.5 g/L | 0 g/L    | 0.33 g/L | 1 g/L | 4.5 g/L | 0 g/L    | 0.33 g/L | 1 g/L | 4.5 g/L |
| Glucose | 76.06    | 75.16    | 73.87 | 75.15   | 56.73    | 57.05    | 59.94 | 62.35   | 32.42    | 18.98    | 14.19 | 24.85   | 4.79     | 2.25     | 0.41  | 8.69    |
| % area  |          |          |       |         |          |          |       |         |          |          |       |         |          |          |       |         |

| SiHa    | 24 h CPX |          |       |         | 48 h CPX |          |       |         | 72 h CPX |          |       |         | 96 h CPX |          |       |         |
|---------|----------|----------|-------|---------|----------|----------|-------|---------|----------|----------|-------|---------|----------|----------|-------|---------|
|         | 0 g/L    | 0.33 g/L | 1 g/L | 4.5 g/L | 0 g/L    | 0.33 g/L | 1 g/L | 4.5 g/L | 0 g/L    | 0.33 g/L | 1 g/L | 4.5 g/L | 0 g/L    | 0.33 g/L | 1 g/L | 4.5 g/L |
| Glucose | 40.36    | 68.83    | 75.29 | 67.24   | 12.02    | 31.39    | 4.82  | 8.17    | 25.20    | 21.30    | 1.46  | 0.46    | 0.55     | 0.02     | 0.00  | 0.03    |
| % area  |          |          |       |         |          |          |       |         |          |          |       |         |          |          |       |         |

**Figure S2.** Quantification of colony formation assays. The percentage of area covered with colonies was quantified for the CFAs depicted in Figures 3, 5, 6, and S2. Where possible also the number of colonies was quantified.

A

## GO glycolytic process

| Symbol | log2FC | Symbol | log2FC | Symbol  | log2FC |
|--------|--------|--------|--------|---------|--------|
| HK2    | 1.52   | NUP155 | 0.51   | PGK2    | 0.18   |
| PFKFB3 | 1.16   | NUP35  | 0.49   | NUP50   | 0.17   |
| HIF1A  | 1.05   | NUP160 | 0.45   | ZBTB7A  | 0.17   |
| ENO2   | 0.76   | RANBP2 | 0.41   | NUP12   | 0.12   |
| ADPGK  | 0.75   | OGDH   | 0.41   | NUP188  | 0.07   |
| HK1    | 0.75   | SEH1L  | 0.40   | POM121C | 0.01   |
| NUP37  | 0.70   | NUP43  | 0.40   | SEC13   | 0.00   |
| ACTN3  | 0.67   | NUP98  | 0.36   | NUP93   | -0.06  |
| NUP210 | 0.64   | NUP214 | 0.32   | NCOR1   | -0.06  |
| TPR    | 0.58   | NDC1   | 0.30   | PFKP    | -0.06  |
| NUP153 | 0.57   | NUP88  | 0.29   | ALDOC   | -0.06  |
| ARNT   | 0.57   | AAAS   | 0.26   | PFKL    | -0.08  |
| NUP54  | 0.57   | NUP205 | 0.25   | PGK1    | -0.13  |
| NUP62  | 0.57   | INSR   | 0.23   | DHTKD1  | -0.28  |
| NUP133 | 0.54   | RAE1   | 0.20   | TIGAR   | -0.30  |
| NUP107 | 0.54   | NUP85  | 0.20   | PRKAG1  | -0.31  |
| NUP58  | 0.53   | ENTPD5 | 0.18   | PRKAA1  | -0.36  |

B

## GO oxidative phosphorylation

| Symbol  | log2FC | Symbol   | log2FC | Symbol  | log2FC |
|---------|--------|----------|--------|---------|--------|
| ATP5MC3 | 1.27   | PGK2     | 0.18   | SHMT2   | -0.13  |
| ACTN3   | 0.67   | COX4I1   | 0.15   | UQCRC1  | -0.17  |
| SDHAF2  | 0.65   | ATP5F1D  | 0.14   | MSH2    | -0.20  |
| COQ9    | 0.63   | UQCC2    | 0.14   | NDUFB10 | -0.20  |
| PPIF    | 0.52   | COX5A    | 0.11   | NDUFB9  | -0.22  |
| DNAJC30 | 0.49   | PDE12    | 0.09   | COX5B   | -0.26  |
| SURF1   | 0.48   | NIPSNAP2 | 0.09   | NDUFC2  | -0.33  |
| COX7A2L | 0.39   | NDUFB6   | 0.06   | UQCRB   | -0.33  |
| MT-ND4  | 0.39   | CYCS     | 0.05   | NDUFB8  | -0.35  |
| ABCD1   | 0.37   | NDUFAF1  | 0.05   | COX6C   | -0.36  |
| ATP5F1A | 0.33   | RHOA     | 0.01   | UQCRC2  | -0.38  |
| UQCR10  | 0.32   | NDUFB11  | -0.01  | UQCRFS1 | -0.44  |
| ATP5F1C | 0.32   | MT-ATP8  | -0.01  | NDUFA9  | -0.47  |
| ATP5F1E | 0.31   | NDUFB5   | -0.04  | CCNB1   | -0.48  |
| SDHA    | 0.31   | MT-ND3   | -0.04  | NDUFB7  | -0.50  |
| ATP5F1B | 0.27   | VCP      | -0.05  | BID     | -0.50  |
| DLD     | 0.27   | NDUFA1   | -0.06  | NDUFB4  | -0.51  |
| MECP2   | 0.25   | CYC1     | -0.06  | NDUFS2  | -0.53  |
| STOML2  | 0.25   | NDUFS6   | -0.10  | NDUFB3  | -0.55  |
| COX15   | 0.24   | UQCRH    | -0.10  | NDUFA11 | -0.55  |
| FXN     | 0.24   | UQCRQ    | -0.12  | NDUFA10 | -0.57  |
| COA6    | 0.23   | PGK1     | -0.13  | MT-CO2  | -0.59  |

**Figure S3.** Gene symbols and log2FC values. Gene symbols and average log2FC values of proteins encoded by genes contained in the gene sets “GO\_glycolytic\_process” (A) and “GO\_oxidative\_phosphorylation” (B), corresponding to Figure 1A. Color scale indicates log2FC: blue, log2FC = -1.5; yellow, log2FC = 0; red, log2FC = 1.5.

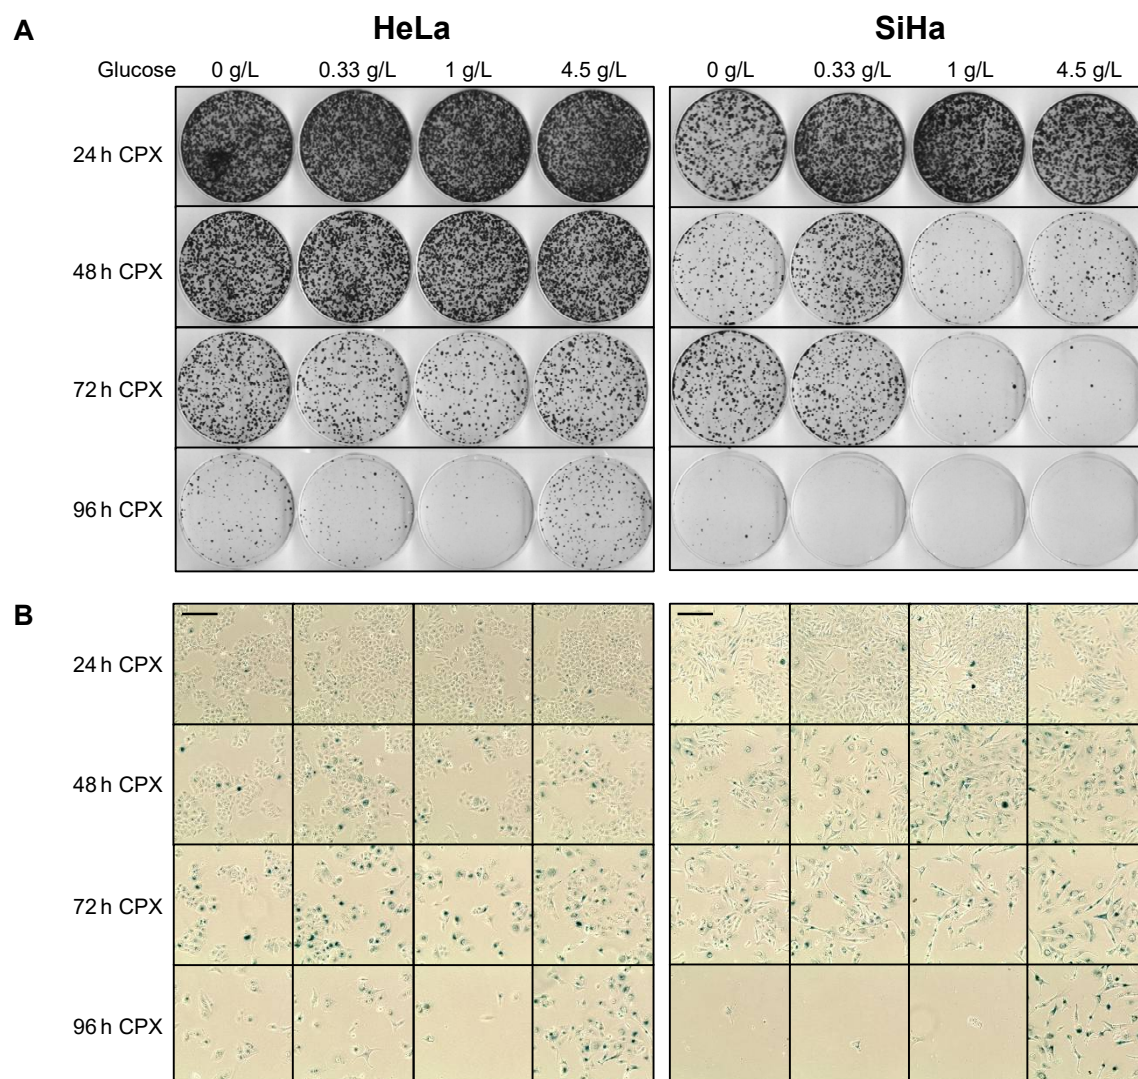

**Figure S4.** Colony forming capacity and senescence induction after 24 to 96 h CPX treatment. Colony formation assays (CFAs) (A) and senescence assays (B) of HeLa and SiHa cells treated with 10  $\mu$ M CPX for 24 to 96 h under the indicated glucose concentrations. The 72 h and 96 h time points are also depicted in Figure 3. For CFAs, cells were grown in CPX-free medium under 1 g/L glucose for 12 days, fixed and stained. SA- $\beta$ -gal assays were performed after release for 4 days. Scale bars: 200  $\mu$ m.

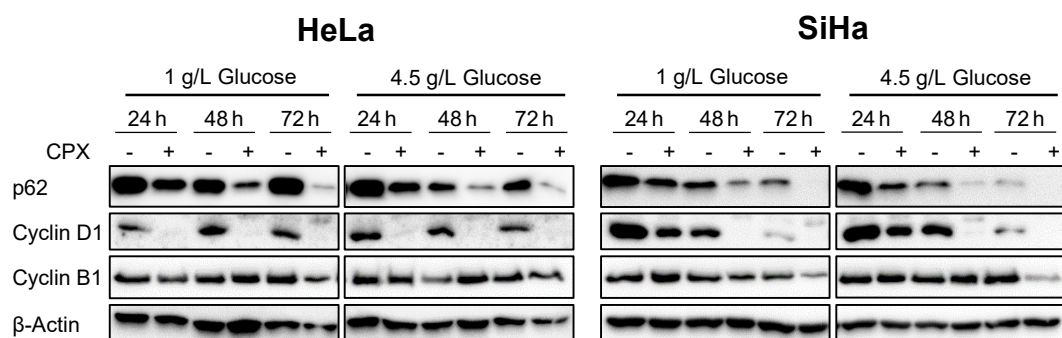

**Figure S5.** Regulation of senescence- and cell cycle-related proteins by CPX. Immunoblot analyses of HeLa and SiHa cells treated for 24, 48, or 72 h with 10  $\mu$ M CPX (+) or solvent control (-), analyzing protein levels of p62, Cyclin D1 and Cyclin B1 upon cultivation under 1 g/L or 4.5 g/L glucose.  $\beta$ -Actin: representative loading control.

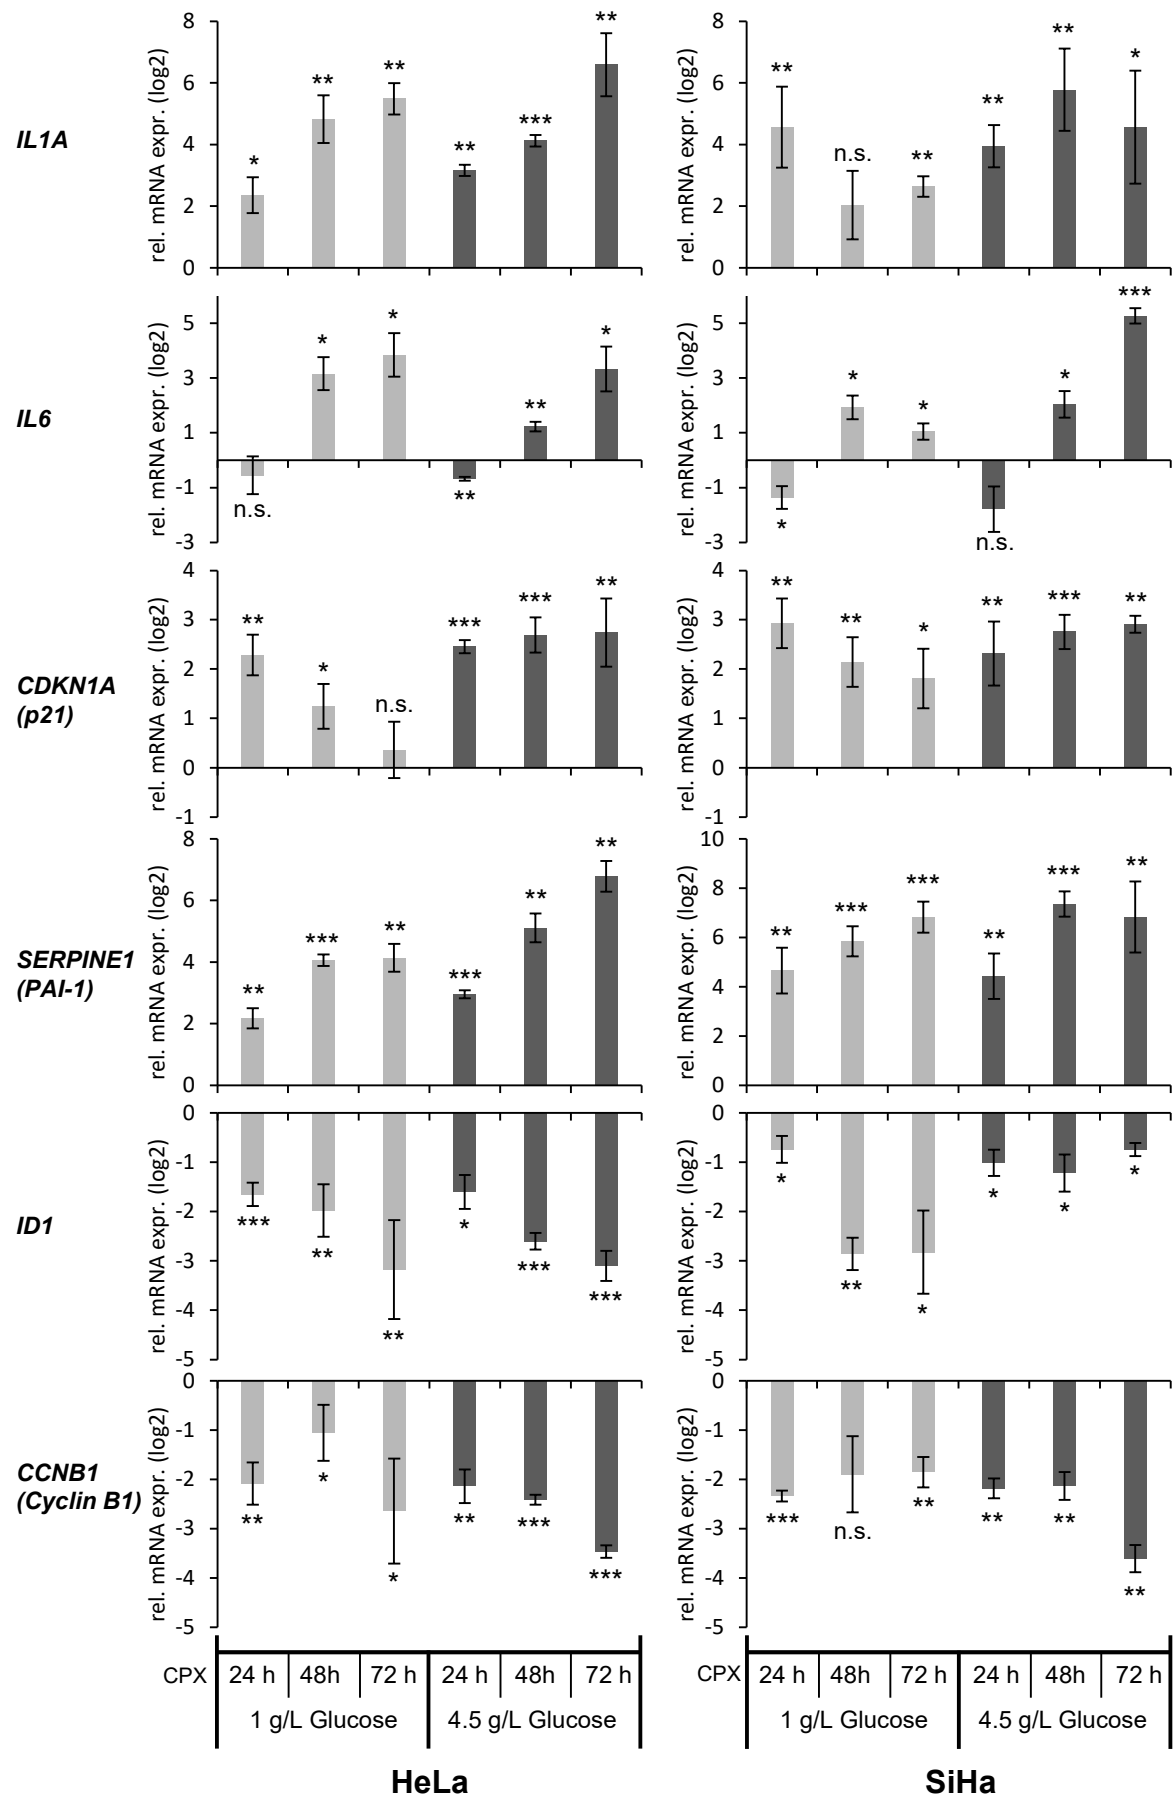

**Figure S6.** Modulation of senescence-associated genes in CPX-treated cervical cancer cells. qRT-PCR analyses determining relative mRNA expression levels of senescence-associated genes in HeLa (left panels) or SiHa (right panels) cells after 24, 48, or 72 h treatment with 10  $\mu$ M CPX under 1 g/L or 4.5 g/L glucose. Expression levels were normalized to solvent control (EtOH) treated cells for each time point and are depicted as log2 fold changes. Error bars indicate standard deviations of 3-4 experiments. n.s., non-significant; \* =  $p \leq 0.05$ ; \*\* =  $p \leq 0.01$ . \*\*\* =  $p \leq 0.001$ .
